# Supplementary material for: Electron tomography visualization of HIV-1 fusion with target cells using fusion inhibitors to trap the pre-hairpin intermediate
Source: eLife. 2020 Jul 22;9:e58411. doi: 10.7554/eLife.58411 (PMC7394545; doi:10.7554/eLife.58411)
Supplement: Figure 3—source data 1. [file elife-58411-fig3-data1.xlsx]

## Sheet: Summary
Sample	Average	St. Dev.	Count
WT6535+T1249-Fc (2 Hr)	2.64286	0.744946	14
CTD6535+T1249-Fc (2 Hr)	3.86667	1.18723	15
SC4226618+T1249-Fc 1st Prep (48 Hr)	2.34483	0.479463	58
SC4226618+T1249-Fc 2nd Prep (4 Hr)	2.33333	0.492366	12
SC4226618+T1249-Fc 3rd Prep (2 Hr)	2.25	0.447214	16
SC4226618+CPT31 3rd Prep (2 Hr)	2.6	0.516398	10
SC4226618+D5Ab 3rd Prep (2 Hr)	2.83333	0.752773	6
Combination 1: All SC4226618 + inhibitor	2.38235	0.508232	102
Combination 2: All w/o CT	2.41379	0.544841	116

## Sheet: data sets
	6535wt+T1249-Fc (2 Hr)	6535delCT+T1249-Fc (2 Hr)	SC4226618+T1249-Fc 1st Prep (48 Hr)	SC4226618+T1249-Fc 2nd Prep (4 Hr)	SC4226618+T1249-Fc 3rd Prep (2 Hr)	SC4226618+CPT31 3rd Prep (2 Hr)	SC4226618+D5Ab 3rd Prep (2 Hr)	Combination 1: All SC4226618 + inhibitor	Combination 2: All w/o CTD
Mean	2.64286	3.86667	2.34483	2.33333	2.25	2.6	2.83333	2.38235	2.41379
Standard Deviation	0.744946	1.18723	0.479463	0.492366	0.447214	0.516398	0.752773	0.508232	0.544841
Count	14	15	58	12	16	10	6	102	116
Data: # Spokes	2	2	2	2	2	3	3
	2	5	2	3	2	3	4
	4	3	3	2	2	3	2
	3	4	2	2	3	3	3
	3	6	2	3	2	2	3
	4	5	3	2	2	2	2
	2	5	2	2	2	2
	2	5	3	2	2	3
	3	3	2	3	2	3
	2	3	3	3	2	2
	3	4	2	2	2
	3	4	3	2	2
	2	2	3		3
	2	3	2		3
		4	2		3
			2		2
			3
			3
			2
			3
			3
			2
			3
			3
			3
			2
			2
			2
			2
			2
			3
			2
			2
			2
			2
			3
			3
			2
			3
			3
			2
			2
			2
			2
			3
			2
			2
			2
			2
			2
			2
			2
			2
			2
			2
			3
			2
			2

## Sheet: t-test WT vs delCT
t-Test: Two-Sample Assuming Unequal Variances
	6535wt+T1249-Fc (2 Hr)	6535delCT+T1249-Fc (2 Hr)
Mean	2.64286	3.86667
Variance	0.554945	1.40952
Observations	14	15
Hypothesized Mean Difference	0
df	24
t Stat	-3.3481
P(T<=t) one-tail	0.00133887
t Critical one-tail	1.71088
P(T<=t) two-tail	0.00267773
t Critical two-tail	2.0639

## Sheet: t-test WT vs Comb1
t-Test: Two-Sample Assuming Unequal Variances
	WT6535+T1249-Fc (2 Hr)	Comb. 1 SC422-inhibitor
Mean	2.64286	2.38235
Variance	0.554945	0.258299
Observations	14	102
Hypothesized Mean Difference	0
df	15
t Stat	1.26855
P(T<=t) one-tail	0.111969
t Critical one-tail	1.75305
P(T<=t) two-tail	0.223937
t Critical two-tail	2.13145

## Sheet: t-test CT vs Comb 2 
t-Test: Two-Sample Assuming Unequal Variances
	6535delCT+T1249-Fc (2 Hr)	Comb. 2 All w/o delCT
Mean	3.86667	2.41379
Variance	1.40952	0.296852
Observations	15	116
Hypothesized Mean Difference	0
df	15
t Stat	4.6763
P(T<=t) one-tail	0.000149176
t Critical one-tail	1.75305
P(T<=t) two-tail	0.000298353
t Critical two-tail	2.13145
